# Supplementary material
Source: publisher figshare collection journal article supplement (https://frontiersin.figshare.com/ndownloader/files/17615873)

## Supplementary Material

### Flow Chart

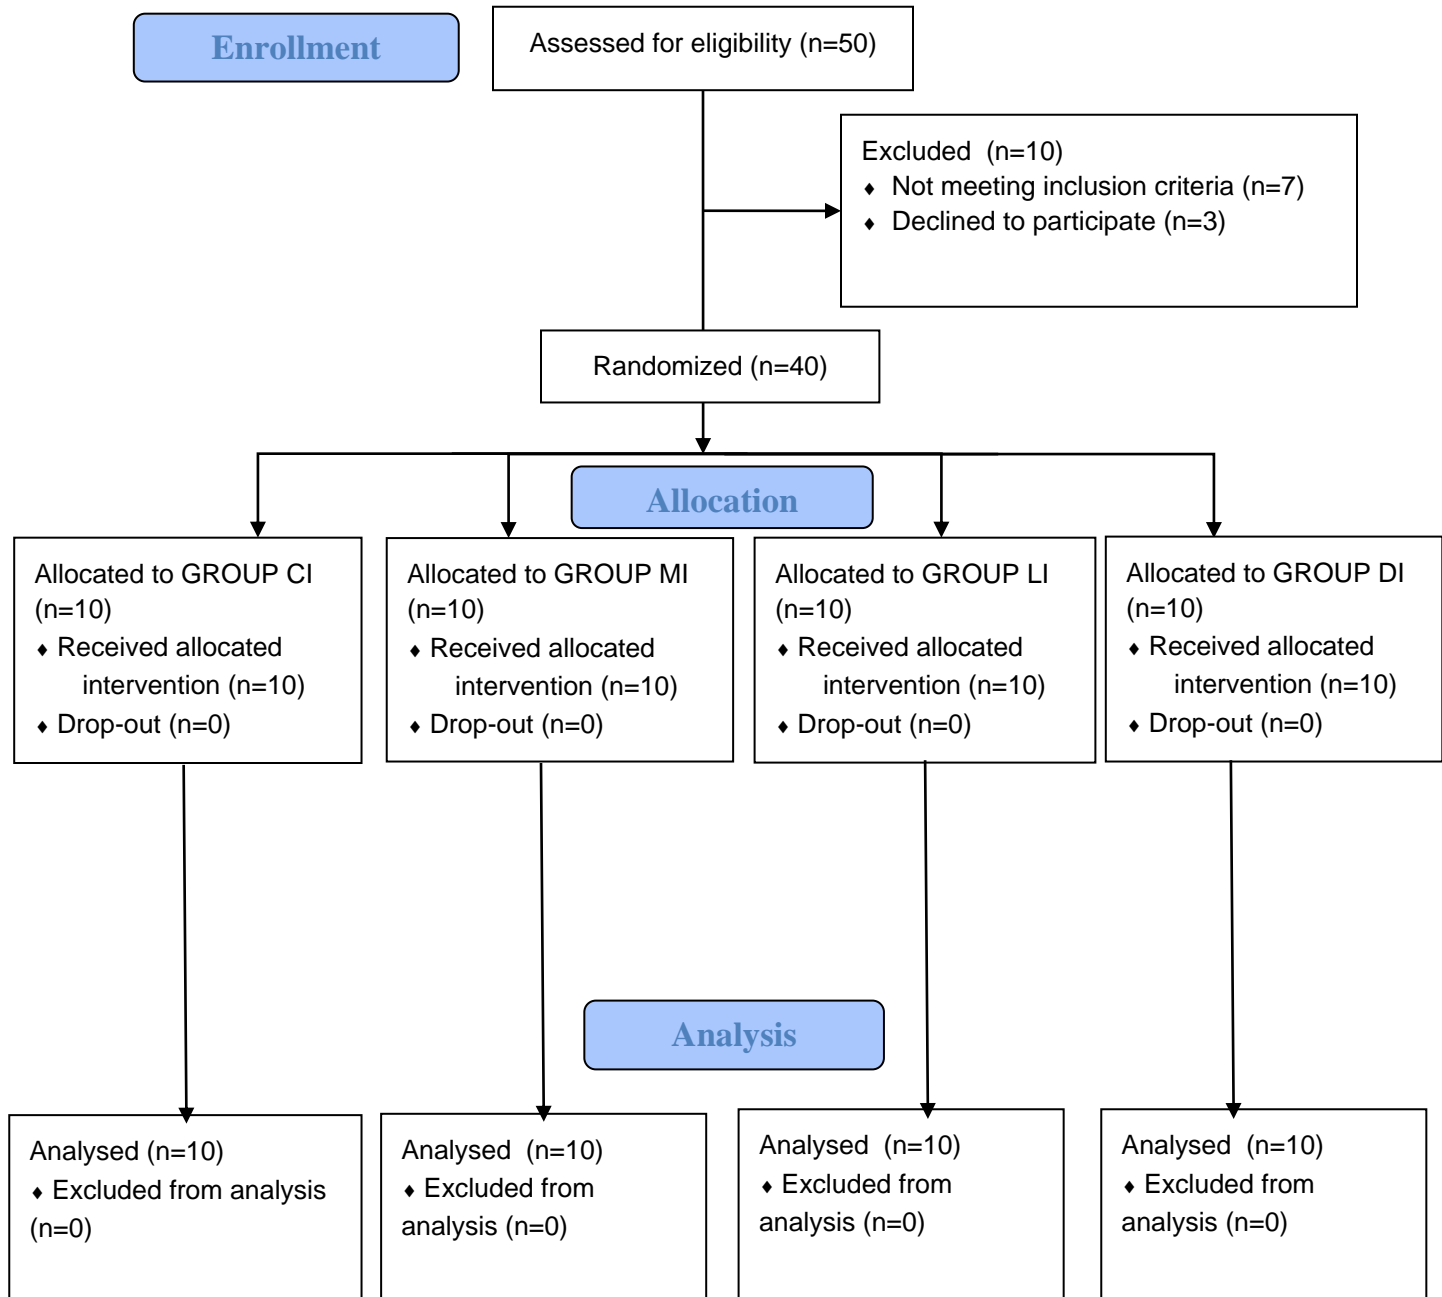

Supplement: Supplementary file [file 17615873]
